CORRECTION

# Correction: Enrichment of minor allele of SNPs and genetic prediction of type 2 diabetes risk in British population

Xiaoyun Lei, Shi Huang

There are errors in the Funding section. The correct funding information is as follows: This work was supported by the Fundamental Research Funds for the Central Universities of Central South University, the National Natural Science Foundation of China [S.H., Grant 81171880], and the National Basic Research Program of China [S.H., Grant 2011CB51001]. The funders had no role in study design, data collection and analysis, decision to publish, or preparation of the manuscript.

## Reference

1. Lei X, Huang S (2017) Enrichment of minor allele of SNPs and genetic prediction of type 2 diabetes risk in British population. PLoS ONE 12(11): e0187644. <https://doi.org/10.1371/journal.pone.0187644> PMID: 29099854

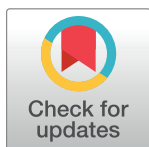

## OPEN ACCESS

**Citation:** Lei X, Huang S (2018) Correction: Enrichment of minor allele of SNPs and genetic prediction of type 2 diabetes risk in British population. PLoS ONE 13(1): e0191210. <https://doi.org/10.1371/journal.pone.0191210>

**Published:** January 9, 2018

**Copyright:** © 2018 Lei, Huang. This is an open access article distributed under the terms of the [Creative Commons Attribution License](https://creativecommons.org/licenses/by/4.0/), which permits unrestricted use, distribution, and reproduction in any medium, provided the original author and source are credited.
